# Supplementary material
Source: PubMed Central journal article supplement (PMC6642731)
Supplement: NIHMS1030724-supplement-Supplementary_Tables.pdf [file NIHMS1030724-supplement-Supplementary_Tables.pdf]

| <b>Primer Name</b> | <b>Primer Sequence</b>     |
|--------------------|----------------------------|
| Abl forward        | 5'GGGTGGAAAACAGGGTGCTA3'   |
| Abl reverse        | 5'GATGGAAAGGACATGCCCA3'    |
| Arg forward        | 5'CAAGGCAGTAGTGGACAGGG3'   |
| Arg reverse        | 5'ATTCCAGGTAGGGATGGGCT3'   |
| CathL forward      | 5'ATCATGGTGTGCTGGTGGTT3'   |
| CathL reverse      | 5'TTCTCCGGTCTTTGGCCATC3'   |
| CathB forward      | 5'AGACCGTACTCCATCCCTCC3'   |
| CathB reverse      | 5'CTGTTTGTAGGTCGGGCTGT3'   |
| CathS forward      | 5'ACCTGGAGCATTCAATGGGAA3'  |
| CathS reverse      | 5'AGCACCACAAGAACCCATGT3'   |
| CathK forward      | 5'TGGATGAAATCTCTCGGCGT3'   |
| CathK reverse      | 5'CCCAGGTGGTTCATAGCCAG3'   |
| Cath Z forward     | 5'TGTCCGGAATTCATGGGGTG3'   |
| Cath Z reverse     | 5'CTCCTCGATGGCAAGGTTGT3'   |
| Ets1 forward       | 5'TCAAGCCGACTCTCACCATC3'   |
| Ets1 reverse       | 5'ATTCCATATCCGGGGAGGGG3'   |
| Sp1 forward        | 5'CCACCATGAGCGACCAAGAT3'   |
| Sp1 reverse        | 5'AAGGCACCACCACCATTACC3'   |
| RPS13 forward      | 5'CGAAAGCATCTTGAGAGGAACA3' |
| RPS13 reverse      | 5'GCACCACGTCCAATGACAT3'    |
| RP2 forward        | 5'GCACCACGTCCAATGACAT3'    |
| RP2 reverse        | 5'GTGCGGCTGCTTCCATAA3'     |

**Supplementary Table S1.** qPCR primer sequences.

| Primer Name  | Primer Sequence              | Gene/Promoter Amplicon |
|--------------|------------------------------|------------------------|
| S6-FP        | 5'GGATGCTTGACAAAACGCC3'      | CathL -681 to -781     |
| S6-RP        | 5'AAGGCATCCCCAAAACACGA3'     |                        |
| S10-FP       | 5'TCTCCTCCCTCCTAGGGTCT3'     | CathL -647 to -738     |
| S10-RP       | 5'GGTGCAGCTGGGCTTTAGAA3'     |                        |
| E1-FP        | 5'GAAACAGTCCACACAGGGCT3'     | CathL -415 to -484     |
| E1-RP        | 5'ACACGACTTACTGCACTGGG3'     |                        |
| E2-FP, S2-FP | 5'CCCAGTGCAGTAAGTCGTGT3'     | CathL -277 to -434     |
| E2-RP, S2-RP | 5'GCGGTTTCGTGGCTTGTTTAC3'    |                        |
| E4-FP        | 5'CCCACGTTTGCTGTGGACTA3'     | CathL -465 to -589     |
| E1-RP        | 5'AGCCCTGTGTGGACTGTTTC3'     |                        |
| S11-FP       | 5'CCCTCTGAGCCTCTTGAATAC3'    | CathB -890 to -988     |
| S11-RP       | 5'AAGACTCACCTCCTCCA3'        |                        |
| S14-FP       | 5'CTGGAGGAGGGTGAGTCTT3'      | CathB -799 to -907     |
| S14-RP       | 5'TCCGAGAGGACGGACAAA3'       |                        |
| S5-FP        | 5'GTGGGTACGTTCTCTGAACAA3'    | CathB -556 to -671     |
| S5-FP        | 5'GCCGTCGCTTATTTATTTCATT3'   |                        |
| P1-FP        | 5'AATGCCACACCCAGCTAAT3'      | CathB -1402 to -1492   |
| P1-RP        | 5'GGATCACGACGTTGGAAGTT3'     |                        |
| P2-FP        | 5'GCGCCTAGCCTGTTTCTT 3'      | CathB -1746 to -1890   |
| P2-RP        | 5'CCTTAGAGTGTGACAGAAGGTATG3' |                        |

**Supplementary Table S2.** ChIP primer sequences. The location of the amplified sequences within the target gene promoters are indicated in the right column.
